# Supplementary material for: Influence of Executive Function Training on BMI, Food Choice, and Cognition in Children with Obesity: Results from the TOuCH Study
Source: MDPI journal article supplement (doi:10.3390/brainsci13020346), 2023-02-17
Supplement: s1 [file s1]

Table S1. Main outcomes at baseline and group comparison (PP analyses)

|                                    | Experimental group |        |        | Control group |        |        | Group comparison |            |
|------------------------------------|--------------------|--------|--------|---------------|--------|--------|------------------|------------|
|                                    | N                  | Mean   | SD     | N             | Mean   | SD     | T/U              | Sig.       |
| <b>Weight and diet</b>             |                    |        |        |               |        |        |                  |            |
| BMI (kg/m <sup>2</sup> )           | 19                 | 29.29  | 3.18   | 17            | 29.70  | 4.22   |                  |            |
| WC (cm)                            | 19                 | 91.94  | 9.18   | 16            | 92.53  | 9.57   | 146.500          | .855       |
| Kidmed (raw score)                 | 18                 | 7.11   | 1.86   | 17            | 6.71   | 2.02   | 133.000          | .500       |
| <b>Cognitive tests (raw score)</b> |                    |        |        |               |        |        |                  |            |
| <b>WISC-V</b>                      |                    |        |        |               |        |        |                  |            |
| Digit span forward                 | 19                 | 5.63   | 1.38   | 17            | 5.29   | .77    | 152.5            | .75        |
| Digit span backward                | 19                 | 4.42   | .84    | 17            | 4.18   | 1.02   | 129.0            | .28        |
| <b>WNV</b>                         |                    |        |        |               |        |        |                  |            |
| Spatial span forward               | 19                 | 5.74   | 1.15   | 17            | 5.65   | 1.22   | 143.0            | .54        |
| Spatial span backward              | 19                 | 5.21   | .71    | 17            | 5.29   | 1.21   | 160.5            | .97        |
| <b>ToL</b>                         |                    |        |        |               |        |        |                  |            |
| Total move                         | 19                 | 38.26  | 15.19  | 17            | 36.41  | 24.21  | 128.0            | .29        |
| Total time                         | 19                 | 304.16 | 117.94 | 17            | 302.18 | 207.86 | 132.0            | .35        |
| <b>CCTT</b>                        |                    |        |        |               |        |        |                  |            |
| Part I                             | 19                 | 25.89  | 11.16  | 17            | 24.29  | 9.98   | -.45             | .65        |
| Part II                            | 19                 | 49.16  | 14.24  | 17            | 49.35  | 11.94  | .04              | .96        |
| <b>FDT</b>                         |                    |        |        |               |        |        |                  |            |
| Reading                            | 19                 | 25.79  | 4.21   | 17            | 26.29  | 4.40   | 147.5            | .66        |
| Counting                           | 19                 | 33.05  | 5.67   | 17            | 35.06  | 6.12   | 1.02             | .31        |
| Choosing                           | 19                 | 56.42  | 11.99  | 17            | 56.76  | 7.60   | 143.0            | .62        |
| Shifting                           | 19                 | 62.89  | 12.77  | 17            | 63.59  | 10.60  | 146.0            | .62        |
| <b>CPT (T-score)</b>               |                    |        |        |               |        |        |                  |            |
| Detectability                      | 19                 | 55.00  | 9.32   | 17            | 56.94  | 9.22   | 140.0            | .50        |
| Omissions                          | 19                 | 49.32  | 6.79   | 17            | 54.47  | 9.25   | 109.5            | .10        |
| Hit Reaction Time                  | 19                 | 47.42  | 6.44   | 17            | 48.76  | 7.09   | .60              | .56        |
| <b>N-back</b>                      |                    |        |        |               |        |        |                  |            |
| Correct responses 0-back           | 19                 | 5.05   | .71    | 17            | 5.26   | .73    | 129.5            | .30        |
| Correct responses 1-back           | 19                 | 5.08   | 1.00   | 17            | 5.00   | 1.16   | 159.5            | .95        |
| Correct responses 2-back           | 19                 | 4.26   | 1.33   | 17            | 4.06   | 1.58   | 153.0            | .79        |
| Correct responses 3-back           | 19                 | 3.08   | .93    | 17            | 3.09   | 1.08   | .03              | .98        |
| <b>Go-No Go</b>                    |                    |        |        |               |        |        |                  |            |
| Correct responses                  | 19                 | 214.58 | 20.88  | 16            | 210.00 | 30.74  | 143.0            | .77        |
| Commissions                        | 19                 | 32.89  | 19.42  | 16            | 33.25  | 13.62  | 138.5            | .66        |
| <b>Rating scales (raw score)</b>   |                    |        |        |               |        |        |                  |            |
| <b>BRIEF</b>                       |                    |        |        |               |        |        |                  |            |
| Cognitive                          | 19                 | 52.74  | 13.589 | 17            | 52.65  | 13.65  | -.02             | .98        |
| Emotional                          | 19                 | 25.68  | 5.86   | 17            | 26.53  | 6.29   | .42              | .68        |
| Behavioral                         | 19                 | 19.16  | 5.98   | 17            | 18.71  | 3.97   | -.26             | .79        |
| <b>PedsQL</b>                      |                    |        |        |               |        |        |                  |            |
| Child's total score                | 19                 | 76.72  | 11.94  | 17            | 77.94  | 12.78  | .30              | .76        |
| Parents' total score               | 19                 | 73.92  | 11.46  | 17            | 72.72  | 16.35  | -.26             | .80        |
| <b>SPPC</b>                        |                    |        |        |               |        |        |                  |            |
| Global self-esteem                 | 18                 | 20.50  | 3.70   | 15            | 18.93  | 4.98   | 112.0            | .40        |
| Social support                     | 18                 | 21.24  | 2.28   | 14            | 21.13  | 2.24   | -.138            | .89        |
| <b>CBCL</b>                        |                    |        |        |               |        |        |                  |            |
| Internalizing symptoms             | 19                 | 7.53   | 4.11   | 17            | 11.30  | 5.73   | 2.28             | <b>.03</b> |
| Externalizing symptoms             | 19                 | 7.53   | 6.25   | 17            | 8.18   | 4.45   | 139.0            | .48        |

Note. Bold p-values indicate statistical significance (p < 0.05).

**Table S2. Baseline characteristics and group comparisons for all randomized participants**

|                                 | Experimental group |       |      | Control group |       |      | Group comparison |                    |
|---------------------------------|--------------------|-------|------|---------------|-------|------|------------------|--------------------|
|                                 | N                  | Mea   | SD   | N             | Mean  | SD   | T/U              | Sig.               |
|                                 | n                  |       |      |               |       |      |                  |                    |
| Age (years)                     | 25                 | 10.40 | 1.04 | 19            | 10.79 | .98  | 187.500          | .213               |
| BMI (percentile)                | 25                 | 98.54 | .78  | 19            | 98.59 | .76  | .221             | .826               |
| Physical activity (hours)       | 25                 | 2.19  | 1.93 | 19            | 2.87  | 4.25 | 235.500          | .961               |
| Daily screen time(hours)        | 25                 | 2.55  | 1.35 | 19            | 1.71  | 0.67 | 142.000          | .022               |
| Visual IQ (scalar score)        | 25                 | 9.84  | 2.58 | 19            | 10.21 | 2.07 | 224.500          | .756               |
| Verbal IQ (scalar score)        | 25                 | 11.16 | 2.70 | 19            | 10.53 | 2.25 | -.827            | .413               |
| Motivation for treatment        | 23                 | 6.26  | .752 | 18            | 6.56  | .783 | 157.000          | .142               |
|                                 | N                  |       |      | N             |       |      | X <sup>2</sup>   | Sig.               |
| Sex (F:M)                       | 10:15              |       |      | 8:11          |       |      | 0.020            | .888               |
| Handedness (R:L)                | 21:4               |       |      | 17:2          |       |      | -                | .684 <sup>†</sup>  |
| Economic income (I:II:III:IV:V) | 7:8:2:2:4          |       |      | 3:4:5:4:0     |       |      | 7.294            | .115 <sup>††</sup> |
| Hospital (CST:SJD)              | 19:6               |       |      | 12:7          |       |      | .855             | .355               |

**(ITT)**

*Note.* <sup>†</sup>Fisher exact test<sup>††</sup>Freeman-Halton Exact Test

**Table S3. Main outcomes at baseline and group comparison for all randomized participants (ITT)**

|                                    | Experimental group |             |           | Control group |             |           | Group comparison |             |
|------------------------------------|--------------------|-------------|-----------|---------------|-------------|-----------|------------------|-------------|
| <b>Weight and diet</b>             | <b>N</b>           | <b>Mean</b> | <b>SD</b> | <b>N</b>      | <b>Mean</b> | <b>SD</b> | <b>T/U</b>       | <b>Sig.</b> |
| BMI (kg/m <sup>2</sup> )           | 25                 | 28.97       | 3.16      | 19            | 30.10       | 4.17      | 203.500          | .420        |
| WC (cm)                            | 25                 | 91.06       | 9.86      | 18            | 94.70       | 11.01     | 1.137            | .262        |
| Kidmed (raw score)                 | 24                 | 7.04        | 1.99      | 19            | 6.68        | 1.92      | 196.000          | .424        |
| <b>Cognitive tests (raw score)</b> |                    |             |           |               |             |           |                  |             |
| <b>WISC-V</b>                      |                    |             |           |               |             |           |                  |             |
| Digit span forward                 | 25                 | 5.52        | 1.26      | 19            | 5.26        | .73       | 226.000          | .755        |
| Digit span backward                | 25                 | 4.32        | .80       | 19            | 4.21        | .98       | 209.500          | .479        |
| Digit span sequencing              | 25                 | 5.48        | 1.05      | 19            | 5.05        | .78       | 187.500          | .168        |
| <b>WNV</b>                         |                    |             |           |               |             |           |                  |             |
| Spatial span forward               | 25                 | 5.60        | 1.16      | 19            | 5.74        | 1.20      | 233.000          | .912        |
| Spatial span backward              | 25                 | 5.20        | 1.00      | 19            | 5.37        | 1.17      | 226.000          | .774        |
| <b>ToL</b>                         |                    |             |           |               |             |           |                  |             |
| Total move                         | 25                 | 37.40       | 15.28     | 19            | 35.42       | 23.55     | 188.500          | .245        |
| Total time                         | 25                 | 314.92      | 123.43    | 19            | 298.84      | 196.22    | 189.000          | .250        |
| <b>CCTT</b>                        |                    |             |           |               |             |           |                  |             |
| Part I-seconds                     | 25                 | 26.64       | 10.44     | 19            | 26.79       | 14.82     | 215.500          | .602        |
| Part II-seconds                    | 25                 | 51.76       | 15.11     | 19            | 49.89       | 11.39     | -.449            | .656        |
| <b>FDT</b>                         |                    |             |           |               |             |           |                  |             |
| Reading                            | 25                 | 26.56       | 4.26      | 19            | 26.11       | 4.27      | -.350            | .728        |
| Counting                           | 25                 | 34.40       | 6.12      | 19            | 35.32       | 6.96      | .463             | .646        |
| Choosing                           | 25                 | 57.12       | 10.96     | 19            | 57.37       | 7.92      | 224.000          | .749        |
| Shifting                           | 25                 | 65.12       | 14.05     | 19            | 64.68       | 11.14     | -.111            | .912        |
| <b>CPT (T-score)</b>               |                    |             |           |               |             |           |                  |             |
| Detectability                      | 25                 | 55.76       | 8.64      | 19            | 57.37       | 8.81      | 207.000          | .469        |
| Omissions                          | 25                 | 49.92       | 6.99      | 19            | 53.95       | 8.94      | 180.500          | .176        |
| Hit Reaction Time                  | 25                 | 48.68       | 7.49      | 19            | 48.89       | 7.48      | 237.000          | .991        |
| <b>N-back</b>                      |                    |             |           |               |             |           |                  |             |
| Correct responses 0-back           | 25                 | 5.12        | .79       | 19            | 5.34        | .73       | 197.500          | .329        |
| Correct responses 1-back           | 25                 | 5.00        | 1.19      | 19            | 4.97        | 1.17      | 236.000          | .971        |
| Correct responses 2-back           | 25                 | 4.02        | 1.40      | 19            | 4.16        | 1.52      | 220.000          | .676        |
| Correct responses 3-back           | 25                 | 3.00        | .96       | 19            | 3.18        | 1.07      | .601             | .551        |
| <b>Go-No Go</b>                    |                    |             |           |               |             |           |                  |             |
| Correct responses                  | 25                 | 213.48      | 21.16     | 18            | 210.72      | 29.27     | 218.00           | .863        |
| Commissions                        | 25                 | 33.56       | 18.36     | 18            | 33.78       | 13.42     | 204.500          | .614        |
| <b>Rating scales (raw score)</b>   |                    |             |           |               |             |           |                  |             |
| <b>BRIEF</b>                       |                    |             |           |               |             |           |                  |             |
| Cognitive                          | 25                 | 51.44       | 13.73     | 19            | 52.68       | 12.91     | 216.500          | .618        |
| Emotional                          | 25                 | 25.44       | 5.77      | 19            | 26.32       | 6.07      | .487             | .629        |
| Behavioral                         | 25                 | 18.92       | 5.87      | 19            | 18.26       | 3.97      | 236.000          | .972        |
| <b>PedsQI</b>                      |                    |             |           |               |             |           |                  |             |
| Child's total score                | 25                 | 75.88       | 12.10     | 19            | 76.77       | 12.61     | .237             | .814        |

|                        |    |       |       |    |       |       |         |      |
|------------------------|----|-------|-------|----|-------|-------|---------|------|
| Parents' total score   | 25 | 74.45 | 12.20 | 19 | 72.20 | 15.63 | -.537   | .594 |
| SPPC                   |    |       |       |    |       |       |         |      |
| Global self-esteem     | 24 | 19.38 | 4.63  | 17 | 18.76 | 4.76  | 187.000 | .650 |
| Social support         | 24 | 20.55 | 3.04  | 16 | 20.42 | 2.87  | 186.000 | .868 |
| CBCL                   |    |       |       |    |       |       |         |      |
| Internalizing symptoms | 25 | 8.60  | 4.89  | 19 | 10.53 | 5.88  | 191.000 | .269 |
| Externalizing symptoms | 25 | 7.48  | 5.81  | 19 | 7.47  | 4.69  | 229.000 | .840 |

*Note.* Statistical significance is set at  $p < 0.05$  level.

**Table S4. EF training effects on primary outcomes: (a) cognition and anthropometric pre-post measures and (b) evolution of food-choice across the 6-week training period (ITT)**

| Main effects                                      |               |    |                    |                     |                           |                |                            | Group by time interaction |                           |          |           |          |
|---------------------------------------------------|---------------|----|--------------------|---------------------|---------------------------|----------------|----------------------------|---------------------------|---------------------------|----------|-----------|----------|
| (a) Pre-post primary outcomes                     |               | n  | Pre-test Mean (SD) | Post-test Mean (SD) | Group F (df); p           | $\eta^2$       | Time F (df); p             | $\eta^2$                  | F (df); p                 | $\eta^2$ |           |          |
| Cognition (z score)                               | EG            | 25 | .01 (.462)         | .05 (.504)          | $F_{(1,42)} = .236; .630$ | .006           | $F_{(1,42)} = .015; .902$  | .000                      | $F_{(1,42)} = .787; .380$ | .018     |           |          |
|                                                   | CG            | 19 | -.01 (.421)        | -.06 (.435)         |                           |                |                            |                           |                           |          |           |          |
| BMI                                               | EG            | 25 | 28.97 (3.16)       | 28.48 (3.07)        | $F_{(1,42)} = 1.20; .280$ | .028           | $F_{(1,42)} = 11.50; .002$ | .215                      | $F_{(1,42)} = .16; .689$  | .004     |           |          |
|                                                   | CG            | 19 | 30.10 (4.17)       | 29.71 (3.99)        |                           |                |                            |                           |                           |          |           |          |
| WC                                                | EG            | 25 | 91.06 (9.86)       | 89.21 (8.00)        | $F_{(1,41)} = 1.92; .173$ | .045           | $F_{(1,41)} = 6.92; .012$  | .144                      | $F_{(1,41)} = 1.14; .291$ | .027     |           |          |
|                                                   | CG            | 18 | 94.69 (11.01)      | 93.42 (10.87)       |                           |                |                            |                           |                           |          |           |          |
| Kidmed Food                                       | EG            | 21 | 7.04 (1.99)        | 6.52 (2.36)         | $F_{(1,36)} = .05; .816$  | .001           | $F_{(1,36)} = .06; .804$   | .002                      | $F_{(1,36)} = .362; .551$ | .010     |           |          |
|                                                   | CG            | 17 | 6.68 (1.92)        | 6.59 (2.06)         |                           |                |                            |                           |                           |          |           |          |
| (b) 6-week training primary outcomes <sup>†</sup> | Fixed effects |    |                    |                     |                           | Random effects |                            |                           |                           |          | Model fit |          |
|                                                   |               |    | Est/Beta           | SE                  | t                         | p              | Param.                     | Covariance                | SE                        | Sig.     | AIC/BIC   |          |
| Kidmed Modified <sup>††</sup>                     | Intercept     |    | 4.299              | .537                | 3.203 to 5.396            | 8.012          | .000                       | Residual                  | 1.843                     | .256     | .000      | 655.606/ |
|                                                   | Group         |    | -.581              | .904                | -2.426 to 1.264           | -.642          | .525                       | Intercept + Time          |                           |          |           | 668.054  |
|                                                   | Time          |    | -.732              | .412                | -1.579 to .114            | -1.766         | .087                       | [subject] UN (1,1)        | 4.207                     | 1.628    | .010      |          |
|                                                   | Group x time  |    | .118               | .685                | -1.285 to 1.521           | .172           | .864                       | UN (2,1)                  | -2.177                    | 1.165    | .062      |          |
|                                                   |               |    |                    |                     |                           |                |                            | UN (2,2)                  | 1.378                     | .972     | .156      |          |

*Note.* <sup>†</sup>Mixed-effects model parameters for food-choice. <sup>††</sup>Scores could go from 0 to 15, larger scores mean better food choice. *F*, mixed ANOVA. Bold values indicate statistical significance ( $p < 0.05$ ).

*Abbreviations.* BMI = body mass index; CG = control group; EG = experimental group; WC = waist circumference.

Table S5. EF training effects on secondary outcomes: post-hoc analyses of cognitive subdomains (ITT)

|                     |    |    | Main effects          |                        |                         |            |                            | Group by time interaction |                         |            |
|---------------------|----|----|-----------------------|------------------------|-------------------------|------------|----------------------------|---------------------------|-------------------------|------------|
|                     |    | n  | Pre-test<br>Mean (SD) | Post-test<br>Mean (SD) | Group<br>F (df); p      | $\eta^2_p$ | Time<br>F (df); p          | $\eta^2_p$                | F (df); p               | $\eta^2_p$ |
| Cognitive domains   |    |    |                       |                        |                         |            |                            |                           |                         |            |
| Attention and speed |    |    |                       |                        |                         |            |                            |                           |                         |            |
|                     | EG | 25 | 5.52 (1.26)           | 5.56 (.92)             | $F_{(1,42)}=.35; .560$  | .008       | $F_{(1,42)}=1.08; .305$    | .025                      | $F_{(1,42)}=.584; .449$ | .014       |
| WISC-V Digit Span   | CG | 19 | 5.26 (.73)            | 5.53 (.61)             |                         |            |                            |                           |                         |            |
| Forward             | EG | 25 | 5.60 (1.16)           | 6.40 (.96)             | $F_{(1,42)}=.16; .695$  | .004       | $F_{(1,42)}=8.81; .005$    | .173                      | $F_{(1,42)}=1.66; .205$ | .038       |
| WNV Spatial Span    | CG | 19 | 5.74 (1.20)           | 6.05 (.97)             |                         |            |                            |                           |                         |            |
| Forward             | EG | 25 | 26.64 (10.44)         | 23.12 (9.13)           | $F_{(1,42)}=.00; .997$  | .000       | $F_{(1,42)}=5.36; .026$    | .113                      | $F_{(1,42)}=.01; .920$  | .000       |
| CCTT Part I Time    | CG | 19 | 26.79 (14.82)         | 22.95 (10.08)          |                         |            |                            |                           |                         |            |
|                     | EG | 25 | 26.56 (4.26)          | 25.72 (4.60)           | $F_{(1,42)}=.00; .979$  | .000       | $F_{(1,42)}=.61; .440$     | .014                      | $F_{(1,42)}=.61; .440$  | .014       |
| FDT Reading Time    | CG | 19 | 26.11 (4.27)          | 26.11 (5.21)           |                         |            |                            |                           |                         |            |
|                     | EG | 25 | 34.40 (6.12)          | 32.24 (5.42)           | $F_{(1,42)}=.12; .734$  | .003       | $F_{(1,42)}=17.18; .000^*$ | .290                      | $F_{(1,42)}=.28; .601$  | .007       |
| FDT Counting Time   | CG | 19 | 35.32 (6.97)          | 32.53 (6.03)           |                         |            |                            |                           |                         |            |
|                     | EG | 25 | 55.76 (8.64)          | 55.04 (8.23)           | $F_{(1,42)}=.28; .601$  | .007       | $F_{(1,42)}=1.56; .219$    | .036                      | $F_{(1,42)}=.12; .734$  | .003       |
| CPT Detectability   | CG | 19 | 57.37 (8.81)          | 56.11 (9.38)           |                         |            |                            |                           |                         |            |
|                     | EG | 25 | 49.92 (6.99)          | 51.80 (7.93)           | $F_{(1,42)}=2.94; .094$ | .065       | $F_{(1,42)}=2.45; .125$    | .055                      | $F_{(1,42)}=.032; .858$ | .001       |
| CPT Omissions       | CG | 19 | 53.95 (8.94)          | 56.32 (13.31)          |                         |            |                            |                           |                         |            |
|                     | EG | 25 | 48.68 (7.49)          | 49.84 (8.02)           | $F_{(1,42)}=.59; .446$  | .014       | $F_{(1,42)}=7.46; .009$    | .151                      | $F_{(1,42)}=2.61; .113$ | .059       |
| CPT Reaction Time   | CG | 19 | 48.89 (7.48)          | 53.42 (12.00)          |                         |            |                            |                           |                         |            |
| Working Memory      |    |    |                       |                        |                         |            |                            |                           |                         |            |
| WISC-V Digit Span   | EG | 25 | 4.32 (.80)            | 4.48 (.92)             | $F_{(1,42)}=.75; .391$  | .018       | $F_{(1,42)}=.24; .630$     | .006                      | $F_{(1,42)}=.24; .630$  | .006       |
| Backward            | CG | 19 | 4.21 (.98)            | 4.21 (.92)             |                         |            |                            |                           |                         |            |

|                              |    |    |                 |                 |                           |      |                              |      |                           |      |
|------------------------------|----|----|-----------------|-----------------|---------------------------|------|------------------------------|------|---------------------------|------|
| WNV Spatial Span             | EG | 25 | 5.20 (1.00)     | 5.80 (1.32)     | $F_{(1,42)} = .21; .651$  | .005 | $F_{(1,42)} = 2.33; .134$    | .053 | $F_{(1,42)} = 2.33; .134$ | .053 |
| Backward                     | CG | 19 | 5.37 (1.17)     | 5.37 (1.07)     |                           |      |                              |      |                           |      |
| N back (1-back)              | EG | 25 | 5.00 (1.19)     | 4.74 (1.33)     | $F_{(1,42)} = .07; .792$  | .002 | $F_{(1,42)} = .76; .388$     | .018 | $F_{(1,42)} = .51; .480$  | .012 |
|                              | CG | 19 | 4.97 (1.17)     | 4.95 (1.26)     |                           |      |                              |      |                           |      |
| N back (2-back)              | EG | 25 | 4.02 (1.40)     | 4.18 (1.84)     | $F_{(1,42)} = 1.26; .268$ | .029 | $F_{(1,42)} = 5.17; .028$    | .110 | $F_{(1,42)} = 2.27; .139$ | .051 |
|                              | CG | 19 | 4.16 (1.52)     | 4.95 (.98)      |                           |      |                              |      |                           |      |
| N back (3-back)              | EG | 25 | 3.00 (.96)      | 3.00 (1.35)     | $F_{(1,42)} = .76; .387$  | .018 | $F_{(1,42)} = .11; .741$     | .003 | $F_{(1,42)} = .11; .741$  | .003 |
|                              | CG | 19 | 3.18 (1.07)     | 3.32 (1.13)     |                           |      |                              |      |                           |      |
| <b>Cognitive flexibility</b> |    |    |                 |                 |                           |      |                              |      |                           |      |
| CCTT Part II Time            | EG | 25 | 51.76 (15.11)   | 43.24 (10.54)   | $F_{(1,42)} = .02; .899$  | .000 | $F_{(1,42)} = 15.67; .000^*$ | .272 | $F_{(1,42)} = .68; .414$  | .016 |
|                              | CG | 19 | 49.89 (11.39)   | 44.32 (7.92)    |                           |      |                              |      |                           |      |
| FDT Shifting Time            | EG | 25 | 65.12 (14.05)   | 56.80 (13.79)   | $F_{(1,42)} = .04; .843$  | .001 | $F_{(1,42)} = 83.64; .000^*$ | .666 | $F_{(1,42)} = .11; .741$  | .003 |
|                              | CG | 19 | 64.68 (11.14)   | 55.74 (10.84)   |                           |      |                              |      |                           |      |
| <b>Inhibitory control</b>    |    |    |                 |                 |                           |      |                              |      |                           |      |
| FDT Choosing Time            | EG | 25 | 57.12 (10.96)   | 51.92 (10.00)   | $F_{(1,42)} = .00; .950$  | .000 | $F_{(1,42)} = 38.25; .000^*$ | .477 | $F_{(1,42)} = .22; .642$  | .005 |
|                              | CG | 19 | 57.37 (7.92)    | 51.32 (9.55)    |                           |      |                              |      |                           |      |
| GNG Correct responses        | EG | 25 | 213.48 (21.16)  | 223.40 (18.41)  | $F_{(1,40)} = .83; .369$  | .020 | $F_{(1,40)} = 5.62; .023$    | .123 | $F_{(1,40)} = .26; .613$  | .006 |
|                              | CG | 18 | 210.72 (29.27)  | 214.83 (18.34)  |                           |      |                              |      |                           |      |
| GNG                          | EG | 25 | 33.56 (18.36)   | 25.32 (13.61)   | $F_{(1,40)} = .15; .704$  | .004 | $F_{(1,40)} = 14.47; .000^*$ | .266 | $F_{(1,40)} = .30; .589$  | .007 |
| Commissions                  | CG | 18 | 33.78 (13.42)   | 29.78 (16.01)   |                           |      |                              |      |                           |      |
| <b>Planning</b>              |    |    |                 |                 |                           |      |                              |      |                           |      |
| ToL Total move               | EG | 25 | 37.40 (15.28)   | 31.12 (14.10)   | $F_{(1,42)} = .09; .771$  | .002 | $F_{(1,42)} = 2.78; .103$    | .062 | $F_{(1,42)} = .08; .781$  | .002 |
|                              | CG | 19 | 35.42 (23.55)   | 30.95 (8.43)    |                           |      |                              |      |                           |      |
| ToL Total time               | EG | 25 | 314.92 (123.43) | 232.76 (106.64) | $F_{(1,42)} = .07; .788$  | .002 | $F_{(1,42)} = 12.30; .001^*$ | .227 | $F_{(1,42)} = .10; .750$  | .002 |
|                              | CG | 19 | 298.84 (196.22) | 230.474 (84.86) |                           |      |                              |      |                           |      |

Note.  $F$ , mixed

ANOVA. Bold values indicate statistical significance ( $p < 0.05$ ) and \* indicates Bonferroni-adjusted statistical significance ( $p < .003$ ).

Abbreviations. CCTT = Children's Colour Trail Test; CG = control group; CPT3 = Conners' Continuous Performance Test 3; EG = experimental group; FDT = Five Digits Test; GNG: Go-no Go; ToL = Tower of London; WISC-V = Wechsler Intelligence Scale for Children (5th ed.); WNV = Weschler non-verbal.

**Table S6. EF training effects on secondary outcomes: (a) post-hoc analyses of rating scales and (b) evolution of healthy habits across the 6-week training period (ITT)**

|                                                     |                        |               |               |                      |                          | Main effects |                          | Group by time interaction |                          |      |                     |
|-----------------------------------------------------|------------------------|---------------|---------------|----------------------|--------------------------|--------------|--------------------------|---------------------------|--------------------------|------|---------------------|
|                                                     |                        |               |               | Group                |                          | Time         |                          |                           |                          |      |                     |
| (a) Rating scales (raw score)                       | n                      | Pre-test      | Post-test     | F (df); p            | $\eta_p^2$               | F (df); p    | $\eta_p^2$               | F (df); p                 | $\eta_p^2$               |      |                     |
| BRIEF-2                                             | Cognitive              | 24            | 51.44 (13.73) | 50.54 (13.89)        | $F_{(1,41)}=.11; .742$   | .003         | $F_{(1,41)}= 8.54; .006$ | .172                      | $F_{(1,41)}= 3.16; .083$ | .072 |                     |
|                                                     |                        | 19            | 52.68 (12.91) | 47.21 (10.21)        |                          |              |                          |                           |                          |      |                     |
|                                                     | Emotional              | 24            | 25.44 (5.77)  | 24.96 (5.99)         | $F_{(1,41)}=.08; .776$   | .002         | $F_{(1,41)}= 4.86; .033$ | .106                      | $F_{(1,41)}= 2.24; .142$ | .052 |                     |
|                                                     |                        | 19            | 26.32 (6.07)  | 23.26 (5.57)         |                          |              |                          |                           |                          |      |                     |
|                                                     | Behavioral             | 24            | 18.92 (5.87)  | 17.79 (5.53)         | $F_{(1,41)}=.29; .594$   | .007         | $F_{(1,41)}= 3.97; .053$ | .088                      | $F_{(1,41)}=.00; .965$   | .000 |                     |
|                                                     |                        | 19            | 18.26 (3.97)  | 17.00 (3.96)         |                          |              |                          |                           |                          |      |                     |
| PedsQI                                              | Child's total score    | 25            | 75.88 (12.10) | 80.13 (10.61)        | $F_{(1,42)}=.03; .863$   | .001         | $F_{(1,42)}= 6.35; .016$ | .131                      | $F_{(1,42)}=.05; .822$   | .001 |                     |
|                                                     |                        | 19            | 76.77 (12.61) | 80.32 (10.16)        |                          |              |                          |                           |                          |      |                     |
|                                                     | Parents' total score   | 25            | 74.45 (12.20) | 76.96 (14.16)        | $F_{(1,42)}=.60; .441$   | .014         | $F_{(1,42)}=.58; .452$   | .014                      | $F_{(1,42)}=.17; .685$   | .004 |                     |
|                                                     |                        | 19            | 72.20 (15.63) | 72.95 (18.35)        |                          |              |                          |                           |                          |      |                     |
| SPPC                                                | Self-esteem            | 22            | 19.38 (4.63)  | 21.26 (2.54)         | $F_{(1,37)}=.63; .433$   | .017         | $F_{(1,37)}= 7.15; .011$ | .162                      | $F_{(1,37)}=.28; .598$   | .008 |                     |
|                                                     |                        | 17            | 18.76 (4.76)  | 21.16 (3.52)         |                          |              |                          |                           |                          |      |                     |
|                                                     | Social support         | 22            | 20.55 (3.04)  | 21.25 (3.07)         | $F_{(1,36)}=.02; .889$   | .001         | $F_{(1,36)}= 8.80; .005$ | .196                      | $F_{(1,36)}=.04; .835$   | .001 |                     |
|                                                     |                        | 16            | 20.42 (2.87)  | 21.08 (1.92)         |                          |              |                          |                           |                          |      |                     |
| CBCL                                                | Internalizing symptoms | 24            | 8.60 (4.89)   | 6.92 (4.61)          | $F_{(1,41)}= 1.92; .173$ | .045         | $F_{(1,41)}= 4.74; .035$ | .104                      | $F_{(1,41)}=.08; .774$   | .002 |                     |
|                                                     |                        | 19            | 10.53 (5.88)  | 8.95 (7.55)          |                          |              |                          |                           |                          |      |                     |
|                                                     | Externalizing symptoms | 24            | 7.48 (5.81)   | 7.50 (7.09)          | $F_{(1,41)}=.12; .734$   | .003         | $F_{(1,41)}=.75; .391$   | .018                      | $F_{(1,41)}=.64; .428$   | .015 |                     |
|                                                     |                        | 19            | 7.47 (4.69)   | 6.42 (4.89)          |                          |              |                          |                           |                          |      |                     |
| (b) 6-week training secondary outcomes <sup>†</sup> |                        | Fixed effects |               |                      |                          |              | Random effects           |                           |                          |      | Model fit           |
|                                                     |                        | Est/Beta      | SE            | 95% CI               | t                        | p            | Param.                   | Covariance                | SE                       | Sig. | AIC/BIC             |
| Daily steeps                                        | Intercept              | 13242.65      | 744.07        | 11733.92 to 14751.38 | 17.80                    | .000         | Residual                 | 4251008.03                | 522396.46                | .000 | 3898.64/<br>3911.99 |
|                                                     | Group                  | -1385.67      | 1550.65       | -3716.60 to 945.25   | -1.20                    | .236         | Intercept + Time         |                           |                          |      |                     |
|                                                     | Time                   | -265.15       | 502.15        | -1287.02 to 756.71   | -.53                     | .601         | [subject] UN (1,1)       | 8815250.90                | 3127819.33               | .005 |                     |
|                                                     | Group x time           | 317.47        | 799.06        | -1306.37 to 1941.24  | .40                      | .694         | UN (2,1)                 | 794953.69                 | 1610874.75               | .622 |                     |
|                                                     |                        |               |               |                      |                          |              | UN (2,2)                 | 1248415.09                | 1468215.27               | .395 |                     |
| Intercept                                           |                        | 493.76        | 7.97          | 477.61 to 509.91     | 61.98                    | .000         | Residual                 | 786.33                    | 100.52                   | .000 |                     |



|                      |              |        |       |                 |       |             |                  |          |         |        |      |           |
|----------------------|--------------|--------|-------|-----------------|-------|-------------|------------------|----------|---------|--------|------|-----------|
| Sleep time<br>(min.) | Group        | -6.62  | 12.43 | -31.80 to 18.56 | -.53  | .597        | Intercept + Time |          |         |        |      | 1918.52/1 |
|                      | Time         | -17.84 | 6.77  | -31.58 to -4.09 | -2.63 | <b>.012</b> | [subject]        | UN (1,1) | 671.39  | 356.72 | .060 | 931.57    |
|                      | Group x time | -.29   | 10.53 | -21.65 to 21.08 | -.03  | .979        |                  | UN (2,1) | -134.11 | 255.19 | .599 |           |
|                      |              |        |       |                 |       |             |                  | UN (2,2) | 145.58  | 244.09 | .551 |           |

Note. <sup>†</sup>Mixed-effects model parameters for physical activity and sleep patterns. *F*, mixed ANOVA. Bold values indicate statistical significance ( $p < 0.05$ ) and \* indicates Bonferroni-adjusted statistical significance ( $p < .005$ ).

Abbreviations. BRIEF-2 = Behaviour Rating Inventory of Executive Function 2; CBCL = Child Behaviour Checklist; PedsQL = Pediatric Quality of Life Inventory; SPPC = Self-Perception and Social Support Profile for Children.

**Table S7. Descriptive data at each time point for diet, physical activity and sleep patterns (PP analyses)**

|                                            |    |    | Week 1                |              | Week 2                |              | Week 3                |              | Week 4                |              | Week 5                |              | Week 6                |              |
|--------------------------------------------|----|----|-----------------------|--------------|-----------------------|--------------|-----------------------|--------------|-----------------------|--------------|-----------------------|--------------|-----------------------|--------------|
|                                            |    |    | n                     | Mean<br>(SD) |
| Diet<br>(modified<br>Kidmed <sup>†</sup> ) | EG | 16 | 4.48<br>(2.13)        | 18           | 3.92<br>(1.73)        | 17           | 4.13<br>(1.91)        | 14           | 3.75<br>(1.60)        | 16           | 2.95<br>(1.30)        | 16           | 3.36<br>(1.73)        |              |
|                                            | CG | 7  | 3.02<br>(2.98)        | 10           | 4.06<br>(2.35)        | 10           | 3.56<br>(1.99)        | 9            | 2.85<br>(1.68)        | 11           | 3.59<br>(2.01)        | 10           | 2.73<br>(1.95)        |              |
| Daily<br>steeps                            | EG | 18 | 13847.79<br>(3969.13) | 16           | 13131.07<br>(2449.42) | 16           | 13439.33<br>(3464.28) | 19           | 13558.06<br>(5126.98) | 19           | 12878.66<br>(4884.22) | 16           | 14111.48<br>(3454.44) |              |
|                                            | CG | 13 | 11245.51<br>(4200.68) | 12           | 12355<br>(2722.28)    | 13           | 12420.53<br>(2160.02) | 14           | 12046.35<br>(3904.55) | 15           | 12577.92<br>(3643.32) | 13           | 11657.85<br>(4223.55) |              |
| Sleep time<br>(min.)                       | EG | 18 | 487.53<br>(42.59)     | 16           | 482.61<br>(38.81)     | 15           | 481.57<br>(30.12)     | 18           | 483.21<br>(30.79)     | 17           | 474.58<br>(22.08)     | 15           | 460.65<br>(37.04)     |              |
|                                            | CG | 14 | 493.10<br>(30.20)     | 12           | 483.32<br>(42.15)     | 12           | 475.62<br>(45.09)     | 11           | 466.02<br>(46.85)     | 14           | 469.15<br>(33.78)     | 13           | 468.10<br>(42.09)     |              |

Note. <sup>†</sup>Scores could go from 0 to 15, larger scores mean better food choice.

Table S8. Descriptive data at each time point for diet, physical activity and sleep patterns (ITT)

|                                                   |    | Week 1 |                       | Week 2 |                       | Week 3 |                       | Week 4 |                       | Week 5 |                       | Week 6 |                       |
|---------------------------------------------------|----|--------|-----------------------|--------|-----------------------|--------|-----------------------|--------|-----------------------|--------|-----------------------|--------|-----------------------|
|                                                   |    | n      | Mean<br>(SD)          |
| <b>Diet<br/>(modified<br/>Kidmed<sup>†</sup>)</b> | EG | 17     | 4.53<br>(2.07)        | 21     | 3.69<br>(1.75)        | 20     | 3.87<br>(1.93)        | 16     | 3.79<br>(1.53)        | 17     | 3.08<br>(1.37)        | 16     | 3.36<br>(1.73)        |
|                                                   | CG | 8      | 3.17<br>(2.79)        | 11     | 3.87<br>(2.31)        | 11     | 3.63<br>(1.89)        | 10     | 2.87<br>(1.59)        | 12     | 3.36<br>(2.07)        | 11     | 2.75<br>(1.85)        |
|                                                   | EG | 21     | 13791.25<br>(3941.37) | 20     | 13215.52<br>(3522.52) | 21     | 13184.62<br>(3615.49) | 22     | 13162.33<br>(4905.59) | 23     | 12861.92<br>(4765.99) | 18     | 14152.99<br>(3576.66) |
| <b>Daily<br/>steeps</b>                           | CG | 15     | 11144.38<br>(3898.31) | 14     | 12390.69<br>(2521.58) | 14     | 12332.63<br>(2101.18) | 15     | 12143.46<br>(3781.27) | 16     | 12824.48<br>(3655.35) | 13     | 11657.85<br>(4223.55) |
|                                                   | EG | 21     | 485.49<br>(39.72)     | 20     | 483.15<br>(38.83)     | 19     | 480.69<br>(26.68)     | 20     | 479.29<br>(31.53)     | 20     | 473.23<br>(25.16)     | 17     | 461.41<br>(35.74)     |
| <b>Sleep<br/>time<br/>(min.)</b>                  | CG | 14     | 493.10<br>(30.20)     | 14     | 475.50<br>(43.59)     | 13     | 471.62<br>(45.52)     | 12     | 458.20<br>(52.25)     | 14     | 469.15<br>(33.78)     | 13     | 468.10<br>(42.09)     |

Note.<sup>†</sup>Scores could go from 0 to 15, larger scores mean better food choice.
